# Supplementary material for: Effect of Diet on Growth Performance of First Crab Stage Callinectes sapidus Rathbun, 1896 (Brachyura: Portunidae): A Comparison of Three Different Regimens
Source: Animals (Basel). 2023 Apr 3;13(7):1242. doi: 10.3390/ani13071242 (PMC10093128; doi:10.3390/ani13071242)
Supplement: Supplementary file 1 [file animals-13-01242-s001.zip › animals-2075198-supplementary.pdf]

# Effect of Diet on Growth Performance of First Crab Stage *Callinectes Sapidus* Rathbun, 1896 (Brachyura: Portunidae): A Comparison of Three Different Regimens

Övgü Gencer<sup>1,2,\*</sup> and Hector Aguilar Vitorino<sup>3,\*</sup>

Table S1. Nutritional content: shrimp, squid, and fish.

|              | Nutritional content   |                     |                      |
|--------------|-----------------------|---------------------|----------------------|
|              | Shrimp (85 g), 60 Cal | Squid (85g), 80 Cal | Fish (85 g), 110 Cal |
| Total Fat    | 1.0 g                 | 1.0 g               | 2.5 g                |
| Cholesterol  | 105 mg                | 200 mg              | 50 mg                |
| Sodium       | 480 mg                | 35 mg               | 50 mg                |
| Carbohydrate | 1.0 g                 | 3.0 g               | 0 g                  |
| Protein      | 12 g                  | 13 g                | 22 g                 |
| Calcium      | 52 mg                 | 46 mg               | 13 mg                |
| Iron         | 0 mg                  | 0.72 mg             | 0.95 mg              |
| Potassium    | 96 mg                 | 0 mg                | 396 mg               |

\*The shrimp is free of its exoskeleton, the squid only includes tentacles, and the fish only includes muscle.
